# Supplementary material for: Enhanced Sorption Performance of Natural Zeolites Modified with pH-Fractionated Humic Acids for the Removal of Methylene Blue from Water
Source: MDPI journal article supplement (doi:10.3390/molecules28207083), 2023-10-14
Supplement: s1 [file s1]

## Supporting Information

### Enhanced sorption performances of natural zeolites modified with pH-fractionated humic acids for methylene blue water removal

Stefano Salvestrini <sup>1,\*</sup>, Jean Debord <sup>2</sup> and Jean-Claude Bollinger <sup>3</sup>

<sup>1</sup> Department of Environmental, Biological and Pharmaceutical Sciences and Technologies, University of Campania "Luigi Vanvitelli", 81100 Caserta, Italy; stefano.salvestrini@unicampania.it

<sup>2</sup> Service de Pharmacologie-Toxicologie, Hôpital Dupuytren, 87042 Limoges, France; jean.debord@unilim.fr

<sup>3</sup> Université de Limoges, Laboratoire E2Lim, Faculté des Sciences et Techniques, 87060 Limoges, France; jean-claude.bollinger@unilim.fr

\* Correspondence: stefano.salvestrini@unicampania.it; Tel.: ++39(0)823274639

#### S1. Calibration curve and determination of the dimerization equilibrium constant

Owing to its cationic nature, MB tends to self-associate forming a variety of aggregates including dimers, trimers and tetramers. At MB concentration lower than 70 ppm, the presence of trimeric and tetrameric forms can be neglected [1] and the reaction scheme reduces to:

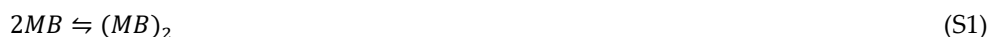

where  $(MB)_2$  is the dimeric form of MB.

Let  $C_m$  and  $C_d$  represent the concentration (mol L<sup>-1</sup> also noted M) of MB in monomeric and dimeric form, respectively. The dimerization equilibrium constant ( $K$ ) is given by:

$$K = \frac{C_d}{C_m^2} \quad (S2)$$

Moreover, the total concentration of MB ( $C$ ) can be expressed as:

$$C = C_m + 2C_d = C_m + 2KC_m^2 \quad (S3)$$

The quadratic equation in  $C_m$  admits the following positive root:

$$C_m = \frac{-1 + \sqrt{1 + 8KC}}{4K} \quad (\text{S4})$$

According to the Lambert-Beer law, the total absorbance ( $A$ ) of the solution by MB species can be written as:

$$A = \epsilon_m l C_m + \epsilon_d l C_d = \epsilon_m l C_m + \epsilon_d l \frac{C - C_m}{2} \quad (\text{S5})$$

where  $\epsilon_m$  and  $\epsilon_d$  are the molar extinction coefficients ( $\text{M}^{-1} \text{cm}^{-1}$ ) of the monomer and dimer, respectively, whereas  $l$  (cm) is the optical length.

Using eq. (S4), we get the absorbance  $A$  as a function of the total concentration  $C$ :

$$A = \left( \epsilon_m - \frac{\epsilon_d}{2} \right) l \cdot \frac{-1 + \sqrt{1 + 8KC}}{4K} + \frac{\epsilon_d l C}{2} \quad (\text{S6})$$

Note that, due to a typing error, a slightly different equation was published by Spencer and Sutter [2]. This equation cannot be inverted analytically to determine the total MB concentration  $C$  from absorbance measurements, but it can be solved with respect to  $C_m$  using the definition of  $K$ :

$$A = \epsilon_m l C_m + \epsilon_d l K C_m^2 \quad (\text{S7})$$

The quadratic equation in  $C_m$  admits the following positive root:

$$C_m = \frac{-\epsilon_m l + \sqrt{(\epsilon_m l)^2 + 4\epsilon_d l K A}}{2\epsilon_d l K} \quad (\text{S8})$$

Equation (S8) allows to calculate  $C_d$  and  $C$  by means of Equations (S2) and (S5), respectively.

The calibration curve was obtained fitting the  $A$  vs  $C$  experimental data with Equation (S6) by non-linear regression analysis and the results are graphically displayed in Figure S1. The estimates of  $\epsilon_m$ ,  $\epsilon_d$  and  $K$  at  $T = 20^\circ \text{C}$  were found to be  $(8.04 \pm 0.01) \times 10^{-4} \text{ M}^{-1} \text{cm}^{-1}$ ,  $(4.0 \pm 0.1) \times 10^{-4} \text{ M}^{-1} \text{cm}^{-1}$  and  $(7.38 \pm 0.01) \times 10^{-3} \text{ M}^{-1}$ ,

respectively; these values are in very good agreement with those reported in recent literature at similar temperature and wavelength [1]. For absorbance measurements at  $T \neq 20\text{ }^{\circ}\text{C}$ , the calibration curve was corrected taken the values of  $K$  from the literature [1].

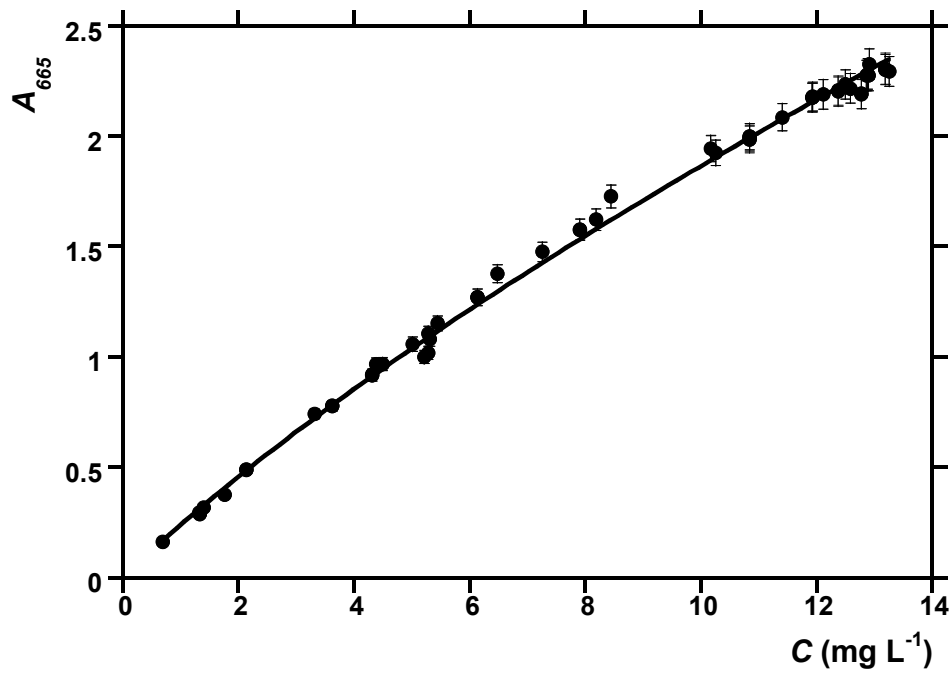

**Figure S1.** Plot of the absorbance at 665 nm ( $A_{665}$ ) vs the total MB concentration in solution ( $C$ ) at  $T = 20\text{ }^{\circ}\text{C}$ . The curve in figure was obtained via nonlinear curve-fitting using Equation (S6).

## S2. Sorption modelling

**Table S1.** Kinetic parameters for the MB sorption onto NYT.

| Model                       | $k_1$<br>( $\text{h}^{-1}$ ) | $k_2$<br>( $\text{g mg}^{-1}$<br>$\text{h}^{-1}$ ) | $B$<br>( $\text{h}^{-1}$ ) | $k_D$<br>( $\text{h}^{-1}$ ) | Res. sum<br>of<br>squares | AICc   |
|-----------------------------|------------------------------|----------------------------------------------------|----------------------------|------------------------------|---------------------------|--------|
| $C_0=11.9\text{ mg L}^{-1}$ |                              |                                                    |                            |                              |                           |        |
| PFO                         | 0.023<br>$\pm$<br>0.003      | -                                                  | -                          | -                            | 1.087                     | -8.23  |
| PSO                         | -                            | 0.0027                                             | -                          | -                            | 0.533                     | -14.63 |

|                                         |                |                 |                 |        |       |        |
|-----------------------------------------|----------------|-----------------|-----------------|--------|-------|--------|
|                                         |                |                 | $\pm$<br>0.0005 |        |       |        |
| Boyd                                    | -              | -               | 0.0036          | -      | 0.093 | -30.36 |
|                                         |                |                 | $\pm$<br>0.0009 |        |       |        |
| Vermeulen                               | -              | -               | -               | 0.0048 | 0.094 | -30.25 |
|                                         |                |                 | $\pm$<br>0.0008 |        |       |        |
| C <sub>0</sub> =10.3 mg L <sup>-1</sup> |                |                 |                 |        |       |        |
| PFO                                     | 0.025          | -               | -               | -      | 1.314 | -6.51  |
|                                         | $\pm$<br>0.003 |                 |                 |        |       |        |
| PSO                                     | -              | 0.0025          | -               | -      | 0.438 | -16.41 |
|                                         |                | $\pm$<br>0.0003 |                 |        |       |        |
| Boyd                                    | -              | -               | 0.0061          | -      | 0.056 | -34.96 |
|                                         |                |                 | $\pm$<br>0.0007 |        |       |        |
| Vermeulen                               | -              | -               | -               | 0.0070 | 0.044 | -37.11 |
|                                         |                |                 | $\pm$<br>0.0005 |        |       |        |
| C <sub>0</sub> =7.9 mg L <sup>-1</sup>  |                |                 |                 |        |       |        |
| PFO                                     | 0.035          | -               | -               | -      | 1.977 | -2.84  |
|                                         | $\pm$<br>0.004 |                 |                 |        |       |        |
| PSO                                     | -              | 0.0042          | -               | -      | 0.568 | -14.06 |
|                                         |                | $\pm$<br>0.0006 |                 |        |       |        |
| Boyd                                    | -              | -               | 0.0135          | -      | 0.092 | -30.42 |
|                                         |                |                 | $\pm$<br>0.0009 |        |       |        |
| Vermeulen                               | -              | -               | -               | 0.013  | 0.151 | -26.01 |
|                                         |                |                 | $\pm$<br>0.001  |        |       |        |
| C <sub>0</sub> =5.9 mg L <sup>-1</sup>  |                |                 |                 |        |       |        |
| PFO                                     | 0.023          | -               | -               | -      | 1.699 | -4.21  |
|                                         | $\pm$<br>0.003 |                 |                 |        |       |        |
| PSO                                     | -              | 0.0025          | -               | -      | 0.901 | -9.92  |
|                                         |                | $\pm$<br>0.0006 |                 |        |       |        |

|                                        |                       |                       |                       |                     |       |        |
|----------------------------------------|-----------------------|-----------------------|-----------------------|---------------------|-------|--------|
| Boyd                                   | -                     | -                     | 0.004<br>±<br>0.001   | -                   | 0.164 | -25.26 |
| Vermeulen                              | -                     | -                     | -                     | 0.005<br>±<br>0.001 | 0.192 | -23.81 |
| C <sub>0</sub> =4.1 mg L <sup>-1</sup> |                       |                       |                       |                     |       |        |
| PFO                                    | 0.0192<br>±<br>0.0001 | -                     | -                     | -                   | 0.020 | -44.35 |
| PSO                                    | -                     | 0.0013<br>±<br>0.0001 | -                     | -                   | 0.195 | -23.69 |
| Boyd                                   | -                     | -                     | 0.0002<br>±<br>0.0011 | -                   | 1.810 | -3.64  |
| Vermeulen                              | -                     | -                     | -                     | 0.002<br>±<br>0.002 | 1.720 | -4.09  |
| C <sub>0</sub> =1.2 mg L <sup>-1</sup> |                       |                       |                       |                     |       |        |
| PFO                                    | 0.037<br>±<br>0.005   | -                     | -                     | -                   | 0.362 | -18.11 |
| PSO                                    | -                     | 0.012<br>±<br>0.001   | -                     | -                   | 0.172 | -24.84 |
| Boyd                                   | -                     | -                     | 0.014<br>±<br>0.003   | -                   | 0.104 | -29.37 |
| Vermeulen                              | -                     | -                     | -                     | 0.013<br>±<br>0.002 | 0.111 | -28.79 |

**Table S2.** Kinetic parameters for the MB sorption onto different sorbents; initial aqueous concentration of MB = 11.9 mg L<sup>-1</sup>; sorbent dosage = 0.29 g L<sup>-1</sup>; pH = 7.4.

| Model | $k_1$<br>(h <sup>-1</sup> ) | $k_2$<br>(g mg <sup>-1</sup><br>h <sup>-1</sup> ) | $B$<br>(h <sup>-1</sup> ) | $k_D$<br>(h <sup>-1</sup> ) | Res. sum of<br>squares | AICc |
|-------|-----------------------------|---------------------------------------------------|---------------------------|-----------------------------|------------------------|------|
|-------|-----------------------------|---------------------------------------------------|---------------------------|-----------------------------|------------------------|------|

| NYT                   |       |        |        |        |        |        |
|-----------------------|-------|--------|--------|--------|--------|--------|
| PFO                   | 0.023 | -      | -      | -      | 0.090  | -37.11 |
|                       | $\pm$ |        |        |        |        |        |
|                       | 0.003 |        |        |        |        |        |
| PSO                   | -     | 0.0027 | -      | -      | 0.044  | -44.37 |
|                       |       | $\pm$  |        |        |        |        |
|                       |       | 0.0005 |        |        |        |        |
| Boyd                  | -     | -      | 0.0036 | -      | 0.093  | -30.36 |
|                       |       |        | $\pm$  |        |        |        |
|                       |       |        | 0.0009 |        |        |        |
| Vermeulen             | -     | -      | -      | 0.0048 | 0.094  | -30.25 |
|                       |       |        |        | $\pm$  |        |        |
|                       |       |        |        | 0.0008 |        |        |
| NYT-HA <sub>ref</sub> |       |        |        |        |        |        |
| PFO                   | 0.09  | -      | -      | -      | 10.543 | 33.73  |
|                       | $\pm$ |        |        |        |        |        |
|                       | 0.02  |        |        |        |        |        |
| PSO                   | -     | 0.005  | -      | -      | 4.555  | 29.53  |
|                       |       | $\pm$  |        |        |        |        |
|                       |       | 0.002  |        |        |        |        |
| Boyd                  | -     | -      | 0.05   | -      | 7.988  | 32.34  |
|                       |       |        | $\pm$  |        |        |        |
|                       |       |        | 0.02   |        |        |        |

|                     |       |             |       |       |       |       |
|---------------------|-------|-------------|-------|-------|-------|-------|
| Vermeulen           | -     | -           | -     | 0.05  | 7.696 | 32.16 |
|                     |       |             |       | $\pm$ |       |       |
|                     |       |             |       | 0.01  |       |       |
| NYT-HA <sub>3</sub> |       |             |       |       |       |       |
| PFO                 | 0.07  | -           | -     | -     | 5.415 | 30.40 |
|                     | $\pm$ |             |       |       |       |       |
|                     | 0.02  |             |       |       |       |       |
| PSO                 | -     | 0.009 $\pm$ | -     | -     | 7.796 | 32.22 |
|                     |       | 0.008       |       |       |       |       |
| Boyd                | -     | -           | 0.05  | -     | 6.240 | 31.11 |
|                     |       |             | $\pm$ |       |       |       |
|                     |       |             | 0.03  |       |       |       |
| Vermeulen           | -     | -           | -     | 0.05  | 6.348 | 31.19 |
|                     |       |             |       | $\pm$ |       |       |
|                     |       |             |       | 0.02  |       |       |
| NYT-HA <sub>5</sub> |       |             |       |       |       |       |
| PFO                 | 0.035 | -           | -     | -     | 1.016 | 22.03 |
|                     | $\pm$ |             |       |       |       |       |
|                     | 0.003 |             |       |       |       |       |
| PSO                 | -     | 0.0017      | -     | -     | 2.877 | 27.24 |
|                     |       | $\pm$       |       |       |       |       |
|                     |       | 0.0005      |       |       |       |       |
| Boyd                | -     | -           | 0.017 | -     | 5.565 | 30.54 |

|                     |       |        |       |       |       |       |
|---------------------|-------|--------|-------|-------|-------|-------|
| <hr/>               |       |        |       |       |       |       |
| $\pm$               |       |        |       |       |       |       |
| 0.007               |       |        |       |       |       |       |
| Vermeulen           | -     | -      | -     | 0.015 | 4.872 | 29.87 |
| $\pm$               |       |        |       |       |       |       |
| 0.006               |       |        |       |       |       |       |
| <hr/>               |       |        |       |       |       |       |
| NYT-HA <sub>7</sub> |       |        |       |       |       |       |
| <hr/>               |       |        |       |       |       |       |
| PFO                 | 0.108 | -      | -     | -     | 1.241 | 23.03 |
| $\pm$               |       |        |       |       |       |       |
| 0.008               |       |        |       |       |       |       |
| PSO                 | -     | 0.0066 | -     | -     | 0.085 | 9.65  |
| $\pm$               |       |        |       |       |       |       |
| 0.0003              |       |        |       |       |       |       |
| Boyd                | -     | -      | 0.077 | -     | 0.728 | 20.36 |
| $\pm$               |       |        |       |       |       |       |
| 0.006               |       |        |       |       |       |       |
| Vermeulen           | -     | -      | -     | 0.070 | 0.616 | 19.53 |
| $\pm$               |       |        |       |       |       |       |
| 0.005               |       |        |       |       |       |       |
| <hr/>               |       |        |       |       |       |       |

## References

1. Fernández-Pérez, A.; Valdés-Solís, T.; Marbán, G. Visible light spectroscopic analysis of Methylene Blue in water; the resonance virtual equilibrium hypothesis. *Dyes Pigments* 2019, 161, 448-456, doi:10.1016/J.DYEPIG.2018.09.083.
2. Spencer, W.; Sutter, J.R. Kinetic study of the monomer-dimer equilibrium of methylene blue in aqueous solution. *J Phys Chem* 1979, 83, 1573–1576, doi: 10.1021/j100475a004
